# Supplementary material for: Epidemiological Characteristics of Mobile Phone Ownership and Use in Korean Children and Adolescents
Source: PubMed Central journal article supplement — Environ Health Toxicol. 2013 Dec 31;28:e2013018. doi: 10.5620/eht.2013.28.e2013018 (PMC3909745; doi:10.5620/eht.2013.28.e2013018), 2013-12-31
Supplement: eht-28-e2013018-s001.pdf [file eht-28-e2013018-s001.pdf]

**Table S1.** Health symptoms related with mobile phone use in children of 10 cities data, 2008, Korea

| Symptoms                 | No. of outgoing calls per day<br>(n=993) <sup>b</sup><br>>1.5 vs. ≤1.5 |              | Average duration of a voice call (min)<br>(n=998) <sup>b</sup><br>≥1 vs. <1 |              | Cumulative time spent for voice calls (hr) <sup>a</sup><br>(n=524) <sup>b</sup><br>≥8.4 vs. <8.4 |              |
|--------------------------|------------------------------------------------------------------------|--------------|-----------------------------------------------------------------------------|--------------|--------------------------------------------------------------------------------------------------|--------------|
|                          | OR                                                                     | (95% CI)     | OR                                                                          | (95% CI)     | OR                                                                                               | (95% CI)     |
|                          | Discomfort                                                             | 3.02         | (1.16-7.86)                                                                 | 2.12         | (0.88-5.11)                                                                                      | 2.33         |
| Dizziness                | 1.41                                                                   | (0.63-3.14)  | 2.64                                                                        | (1.16-5.98)  | 2.53                                                                                             | (0.76-8.45)  |
| Dry skin                 | 4.15                                                                   | (1.12-15.39) | 3.43                                                                        | (1.16-10.10) | 4.22                                                                                             | (0.76-23.55) |
| Eye pain                 | 1.65                                                                   | (0.78-3.47)  | 1.66                                                                        | (0.76-3.60)  | 2.65                                                                                             | (0.79-8.96)  |
| Fatigue                  | 1.25                                                                   | (0.65-2.41)  | 2.73                                                                        | (1.43-5.21)  | 2.22                                                                                             | (0.86-5.74)  |
| Headache                 | 1.36                                                                   | (0.60-3.09)  | 2.04                                                                        | (0.91-4.60)  | 2.91                                                                                             | (0.89-9.48)  |
| Impaired concentration   | 2.68                                                                   | (1.47-4.90)  | 2.22                                                                        | (1.26-3.93)  | 3.02                                                                                             | (1.49-6.11)  |
| Impaired memory          | 2.35                                                                   | (1.09-5.08)  | 2.17                                                                        | (1.04-4.53)  | 5.44                                                                                             | (1.51-19.63) |
| Itching/tingling of face | 1.41                                                                   | (0.50-4.03)  | 2.11                                                                        | (0.69-6.45)  | 0.52                                                                                             | (0.04-6.68)  |
| Redness on skin          | 1.89                                                                   | (0.65-5.49)  | 0.59                                                                        | (0.13-2.75)  | 0.31                                                                                             | (0.03-3.35)  |
| Warmth around the ear    | 1.25                                                                   | (0.73-2.13)  | 1.36                                                                        | (0.73-2.50)  | 1.83                                                                                             | (0.79-4.24)  |

Odds ratios (ORs) and 95% confidence intervals (CIs) estimated using multiple logistic regression adjusted for gender, grade, area, and local taxes.

<sup>a</sup>Using their own mobile phone created with four variables: number of received calls a day plus number of outgoing calls a day and then multiplied by the average time spent per voice call and duration of mobile phone owned; <sup>b</sup>Excluded children who have never used mobile phone or missed information for mobile phone use variables.
